# Supplementary material for: Prognostic analysis of histopathological images using pre-trained convolutional neural networks: application to hepatocellular carcinoma
Source: PeerJ journal article supplement (doi:10.7717/peerj.8668), 2020-03-12

**A**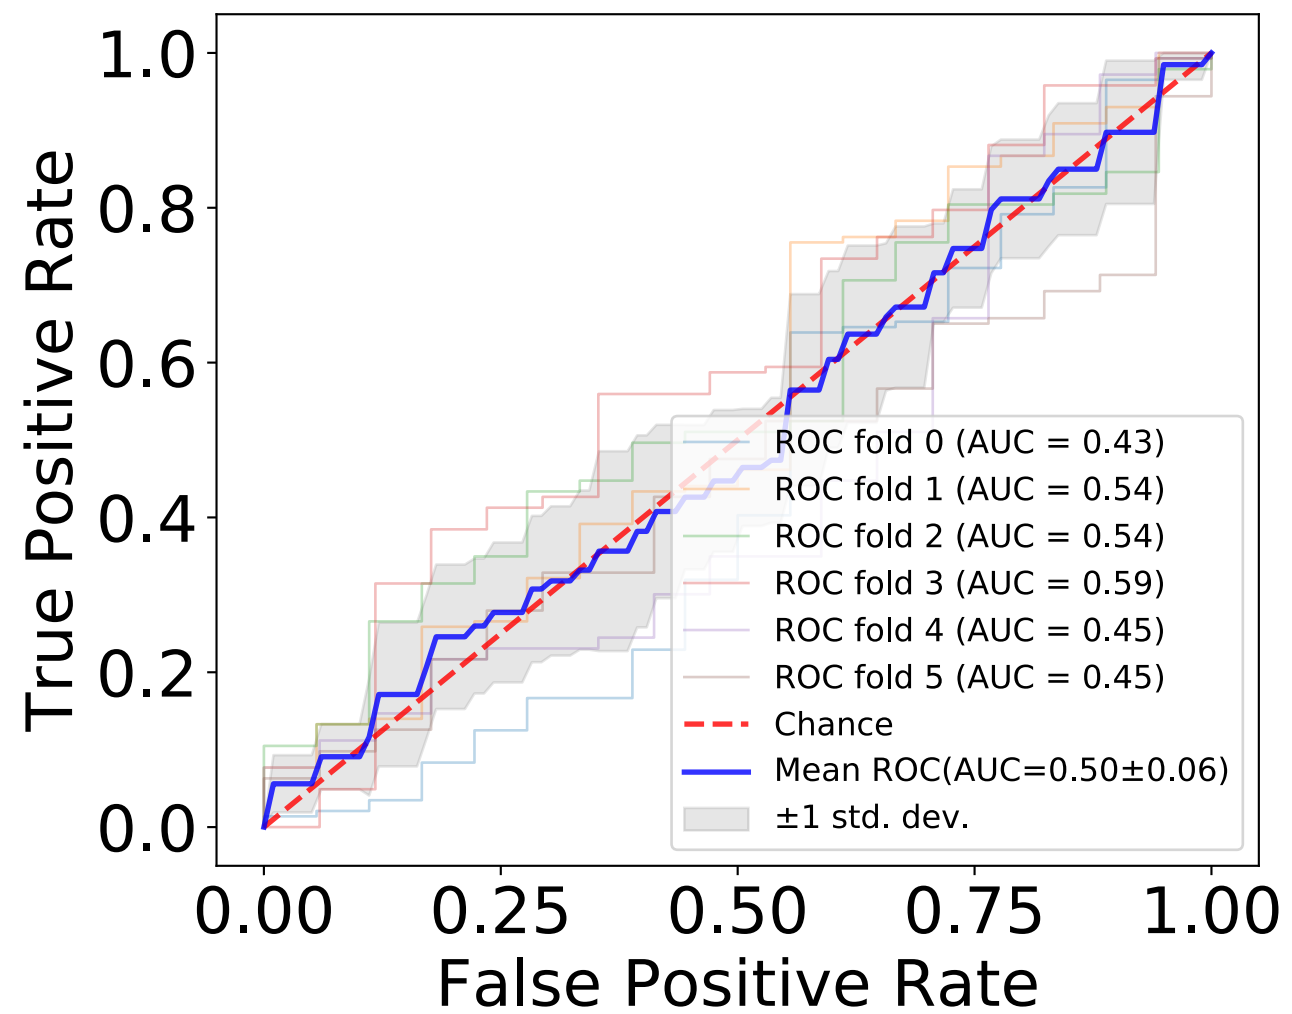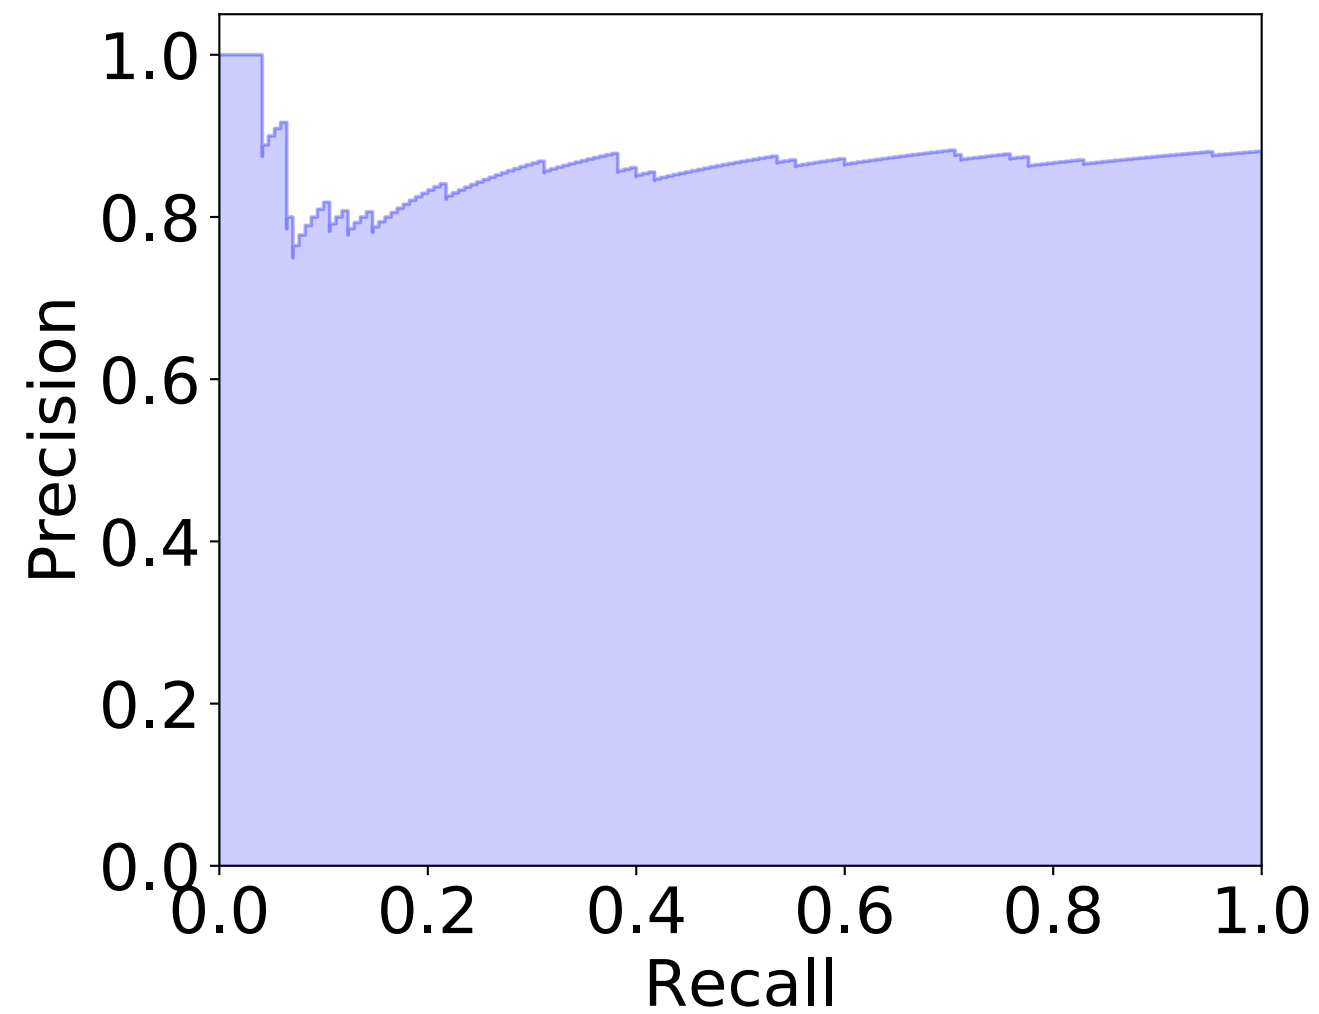**B**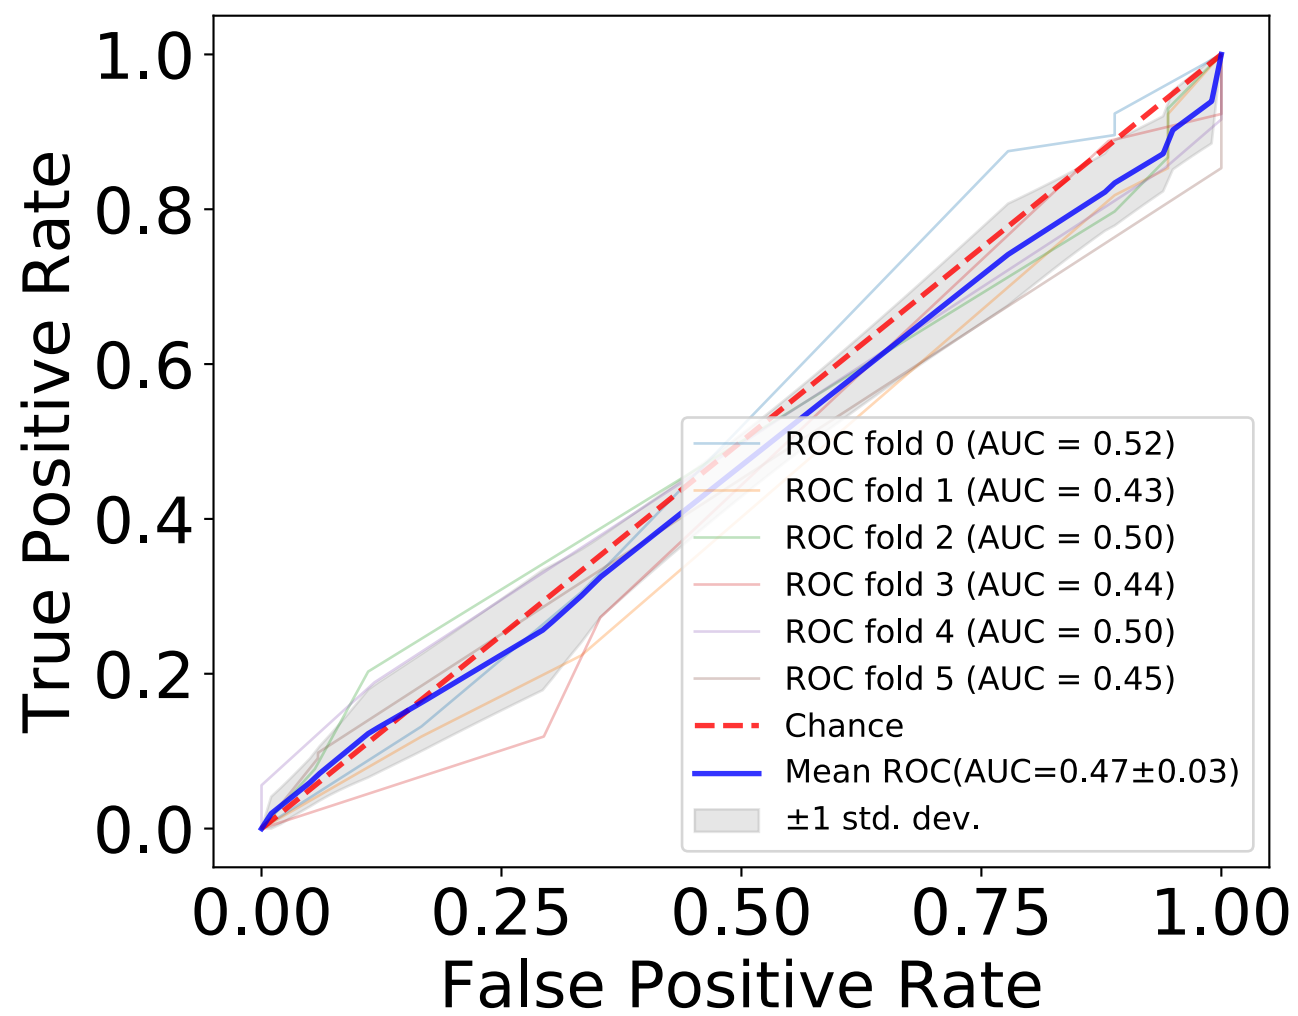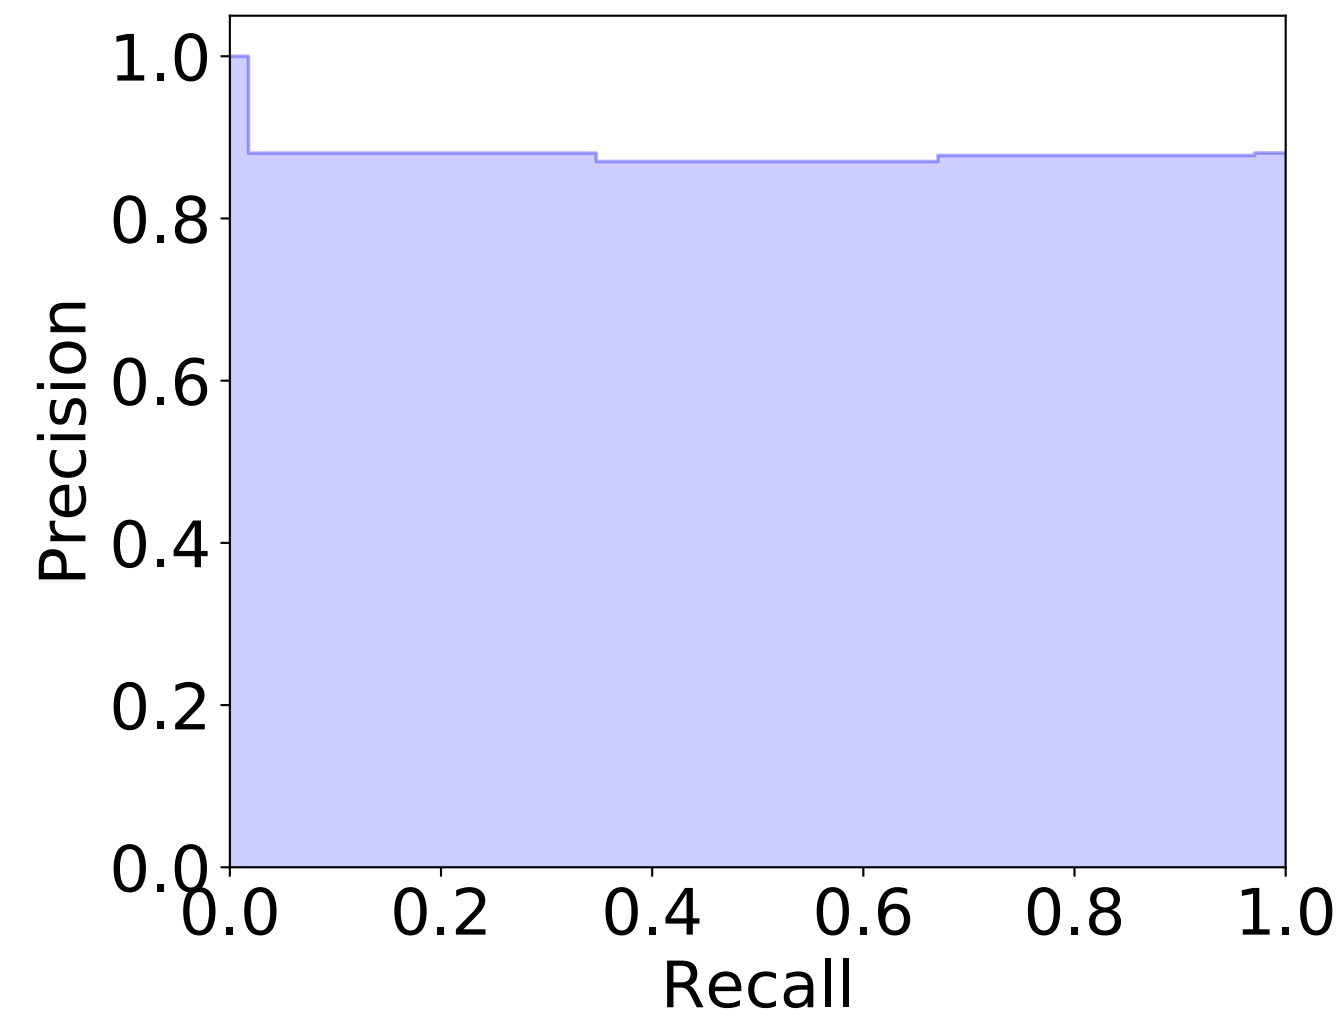

Supplement: HCC_Sfigure1.pdf [file HCC_Sfigure1.pdf]
