# Supplementary material for: Prognostic analysis of histopathological images using pre-trained convolutional neural networks: application to hepatocellular carcinoma
Source: PeerJ journal article supplement (doi:10.7717/peerj.8668), 2020-03-12

A

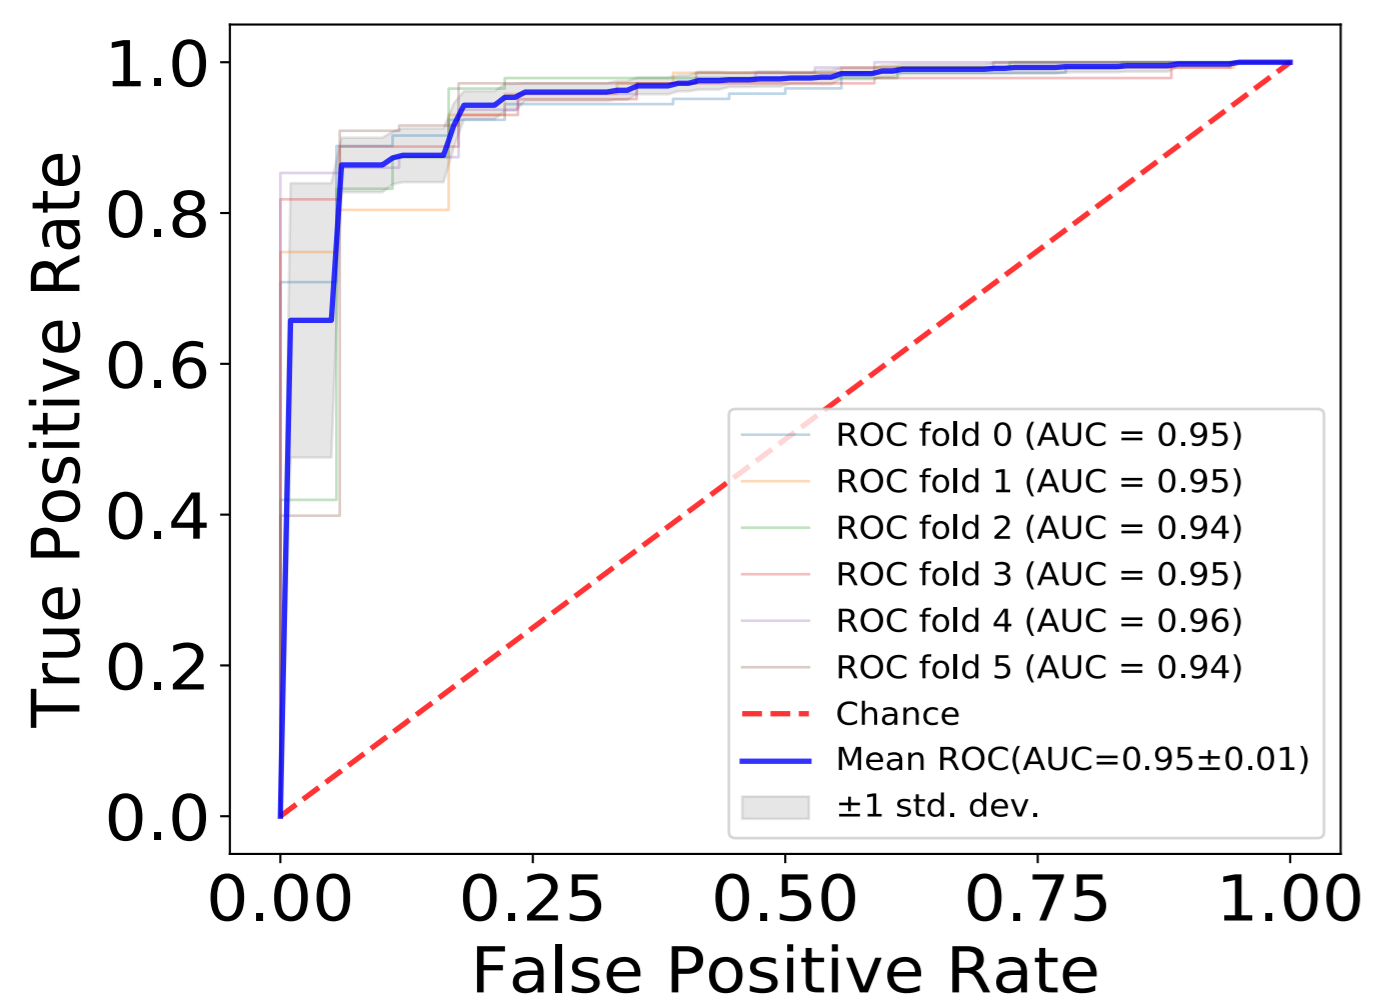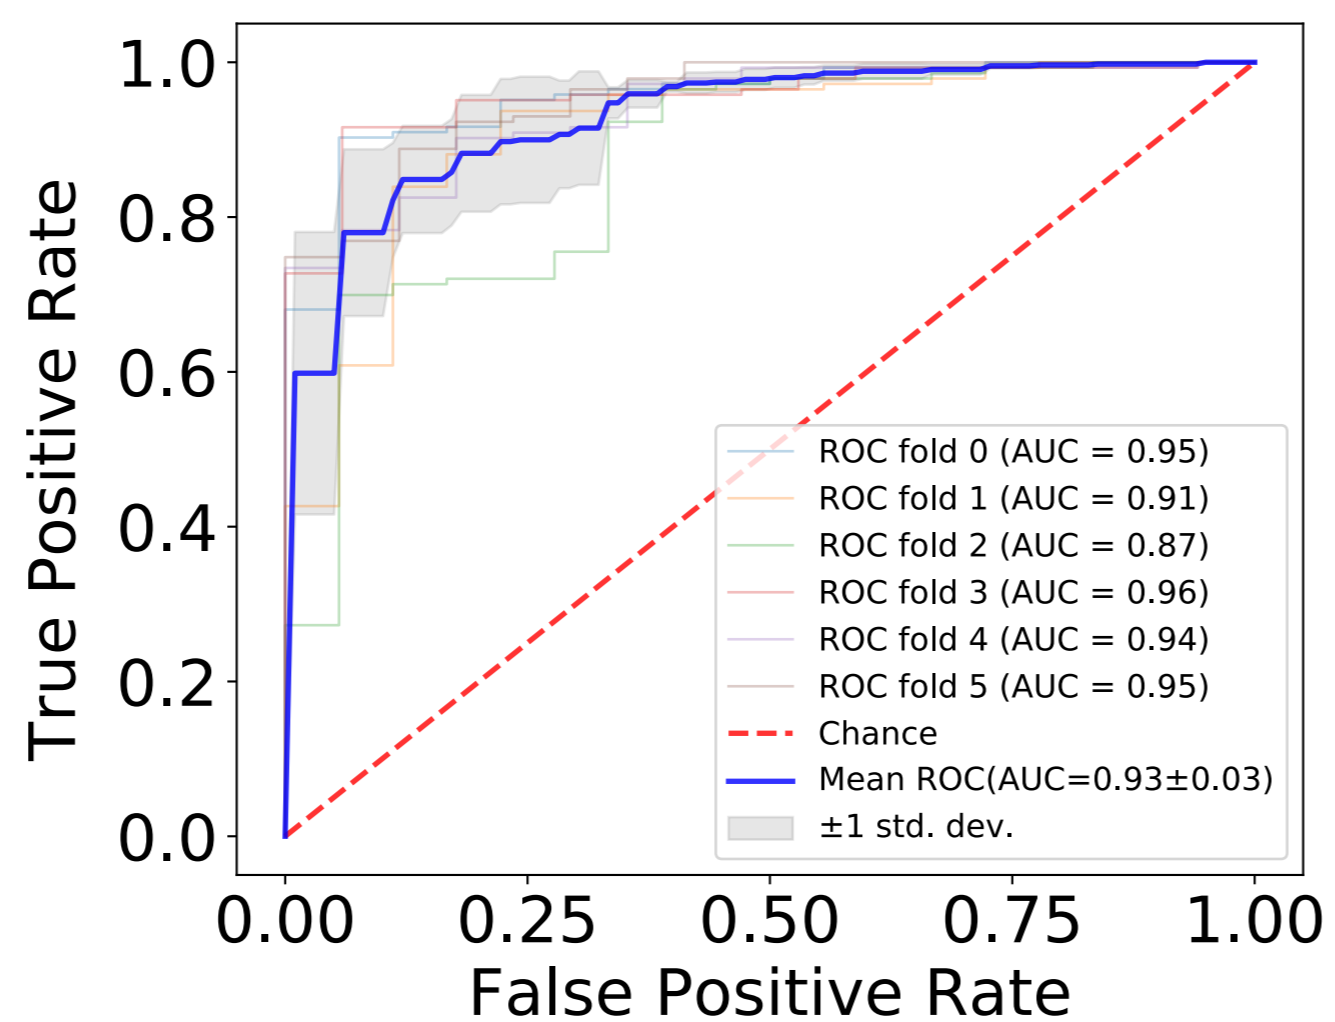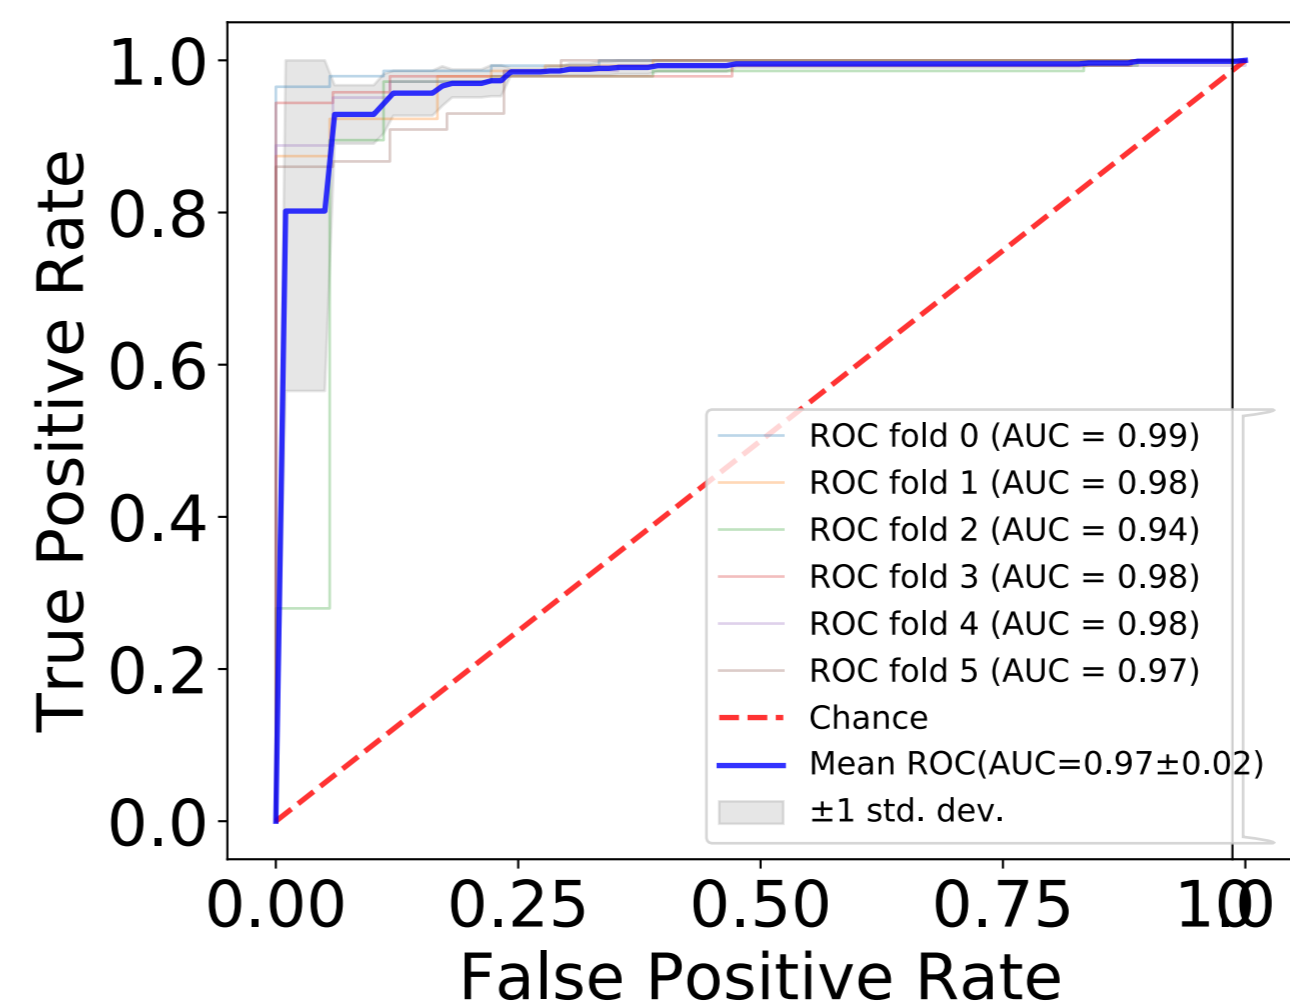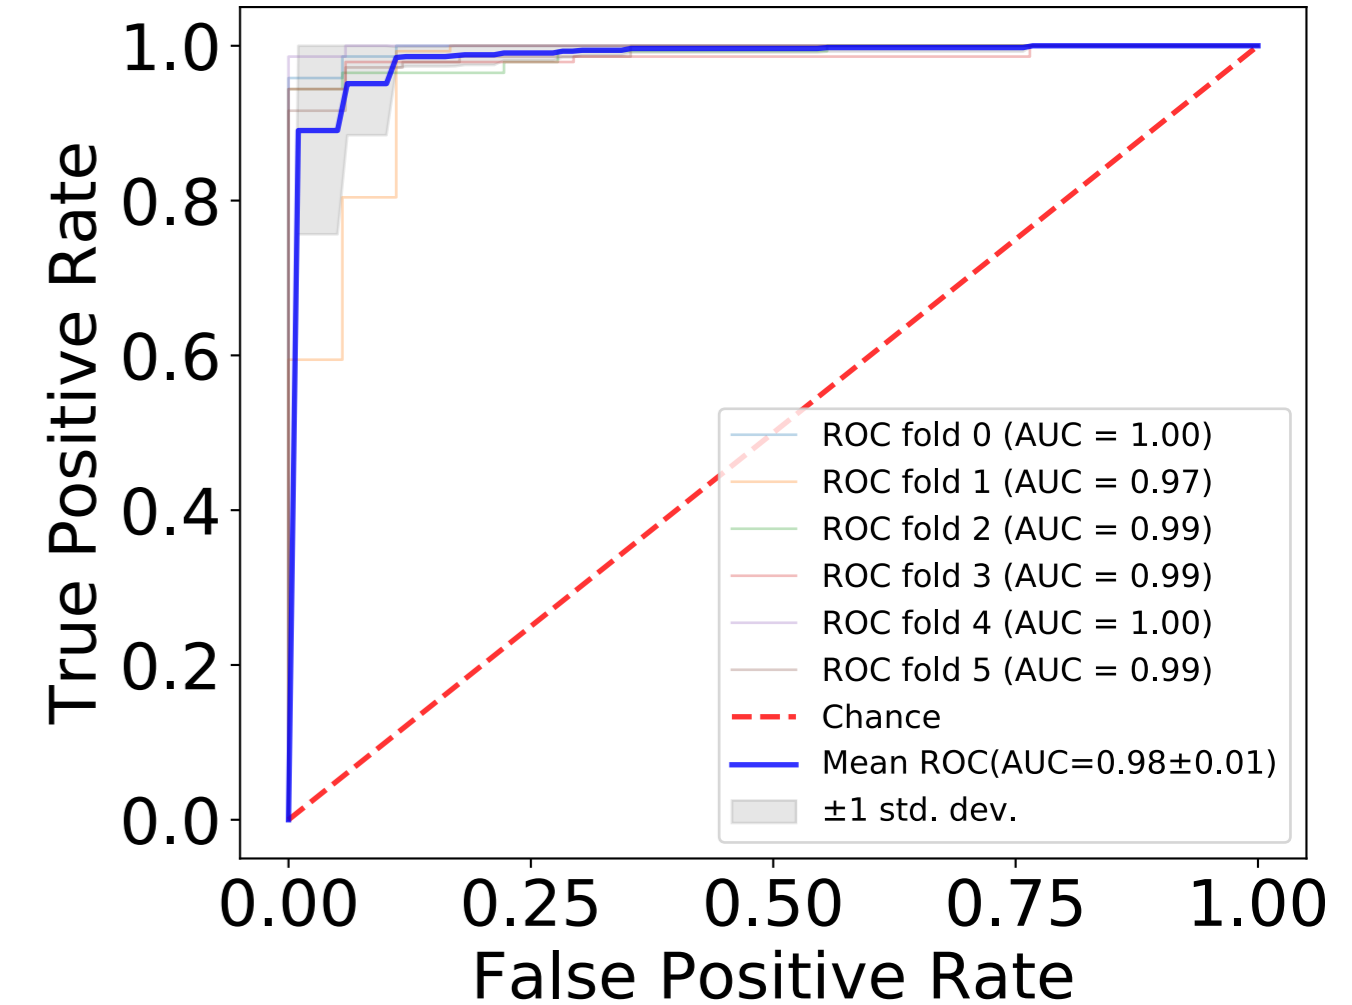

B

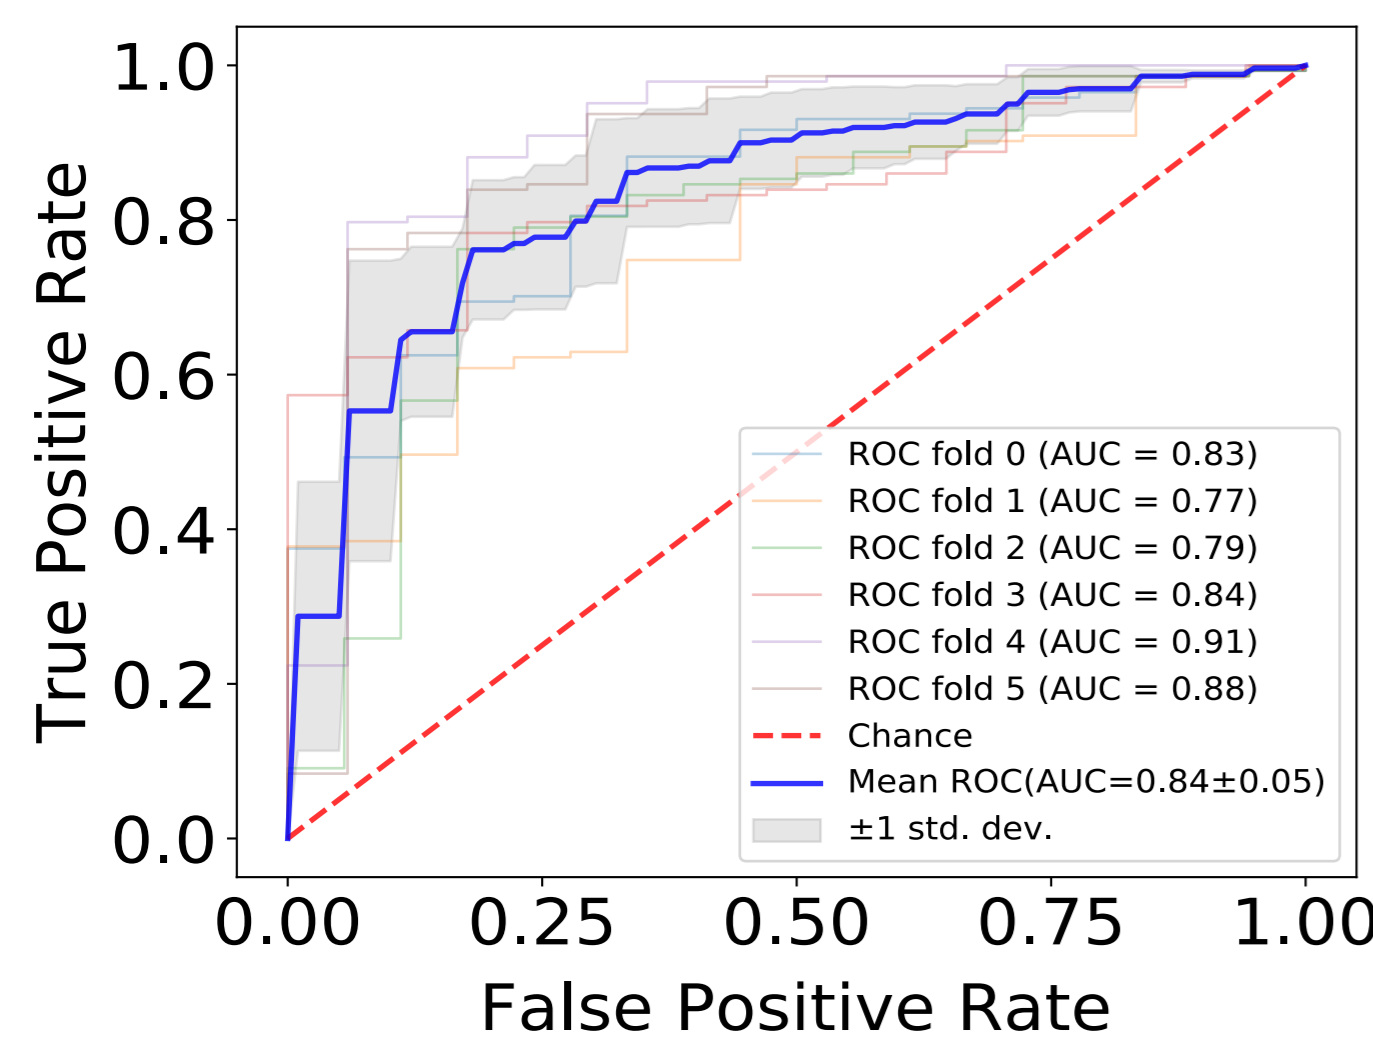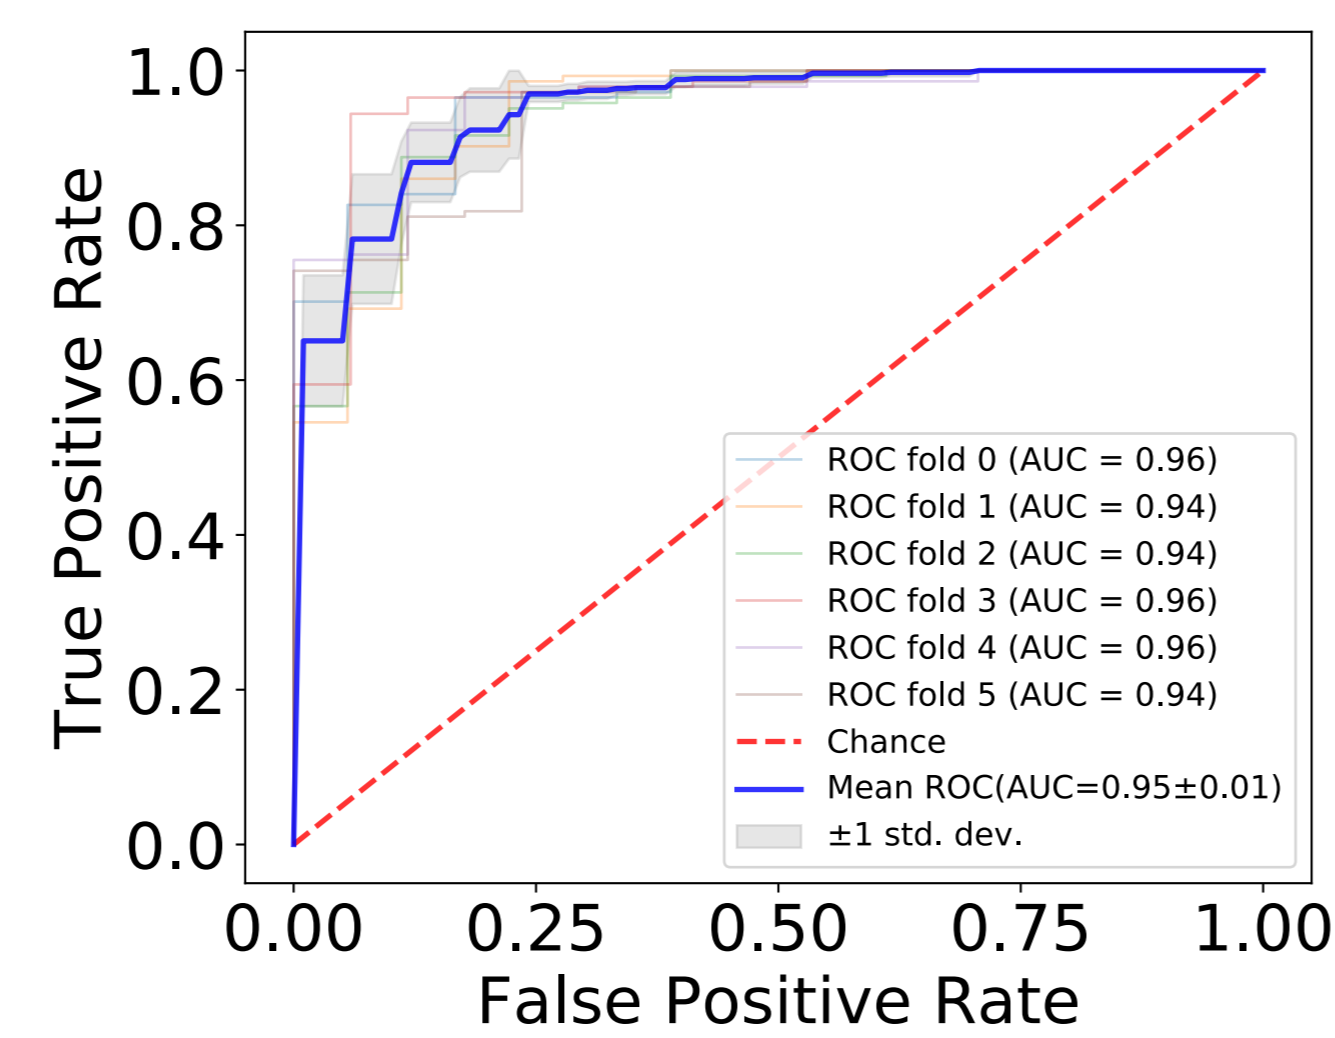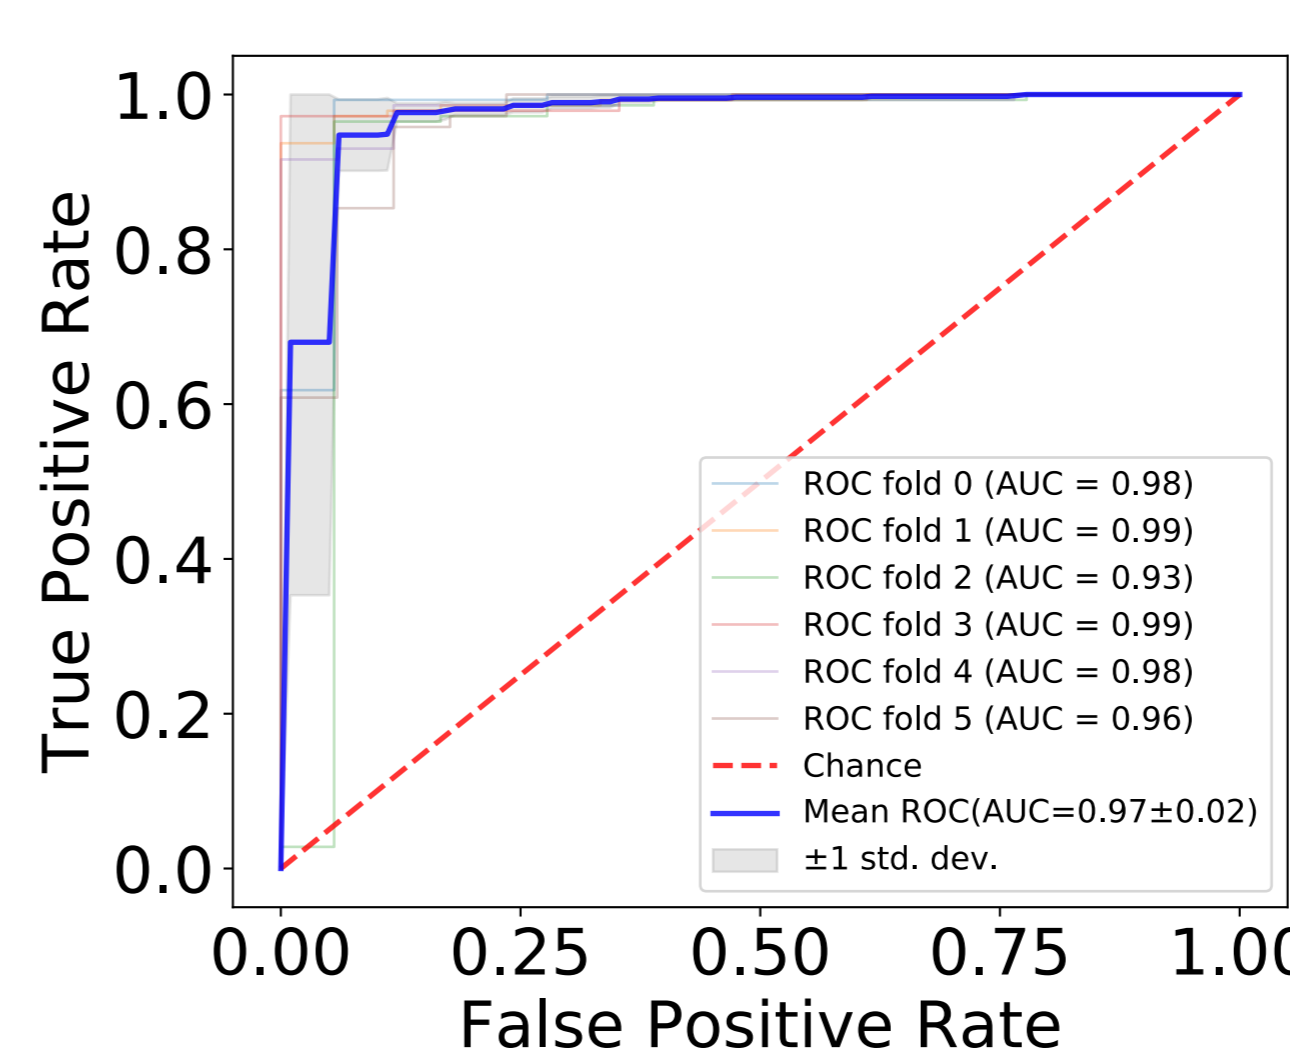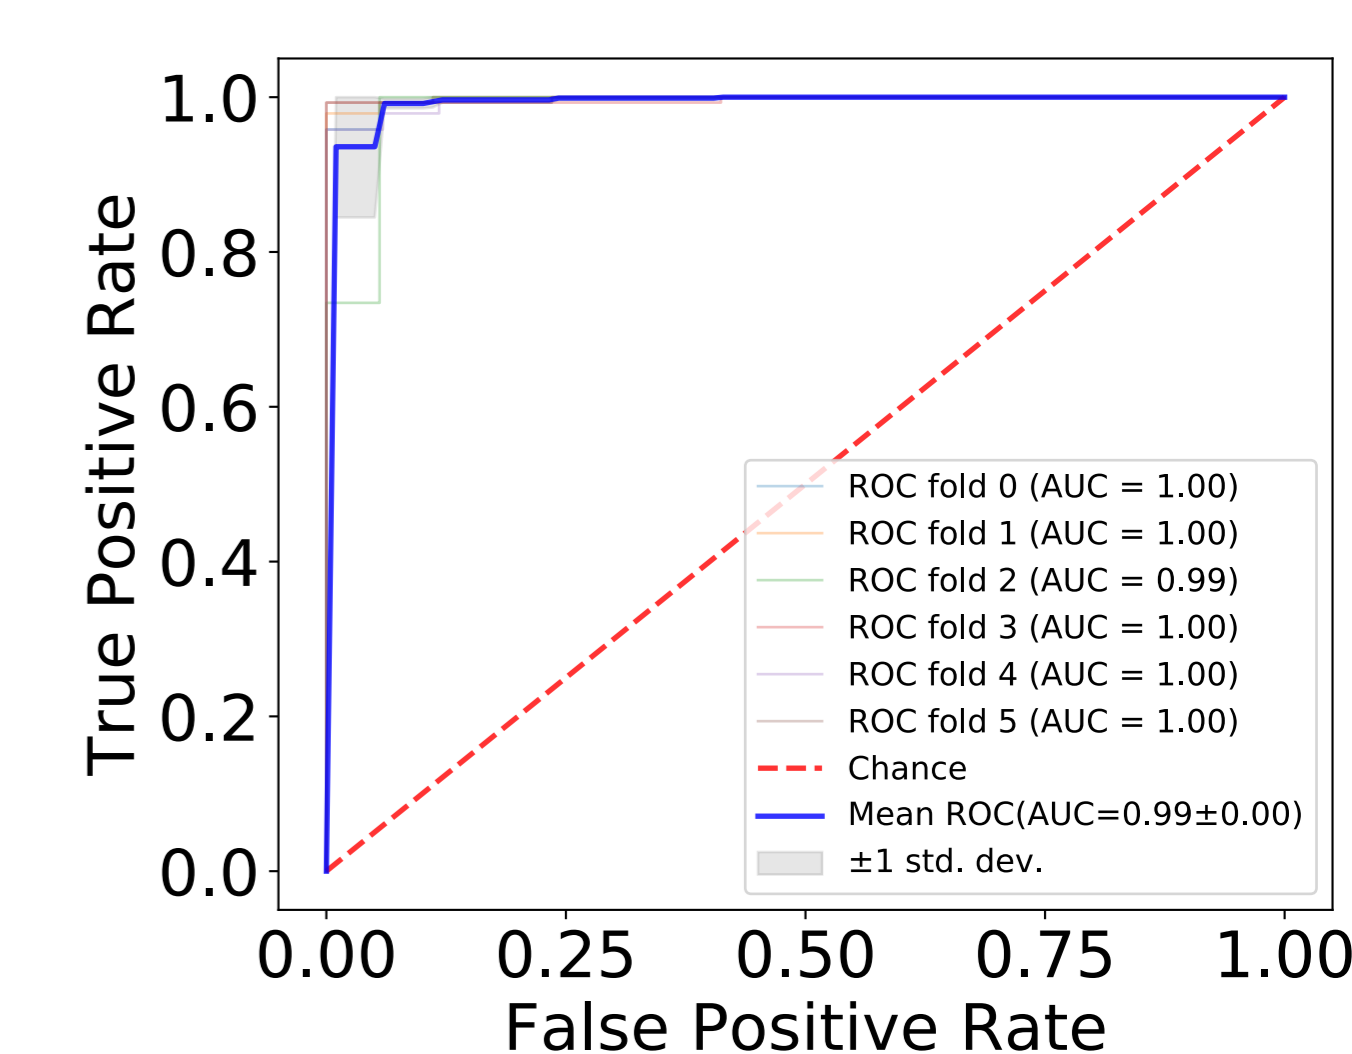

C

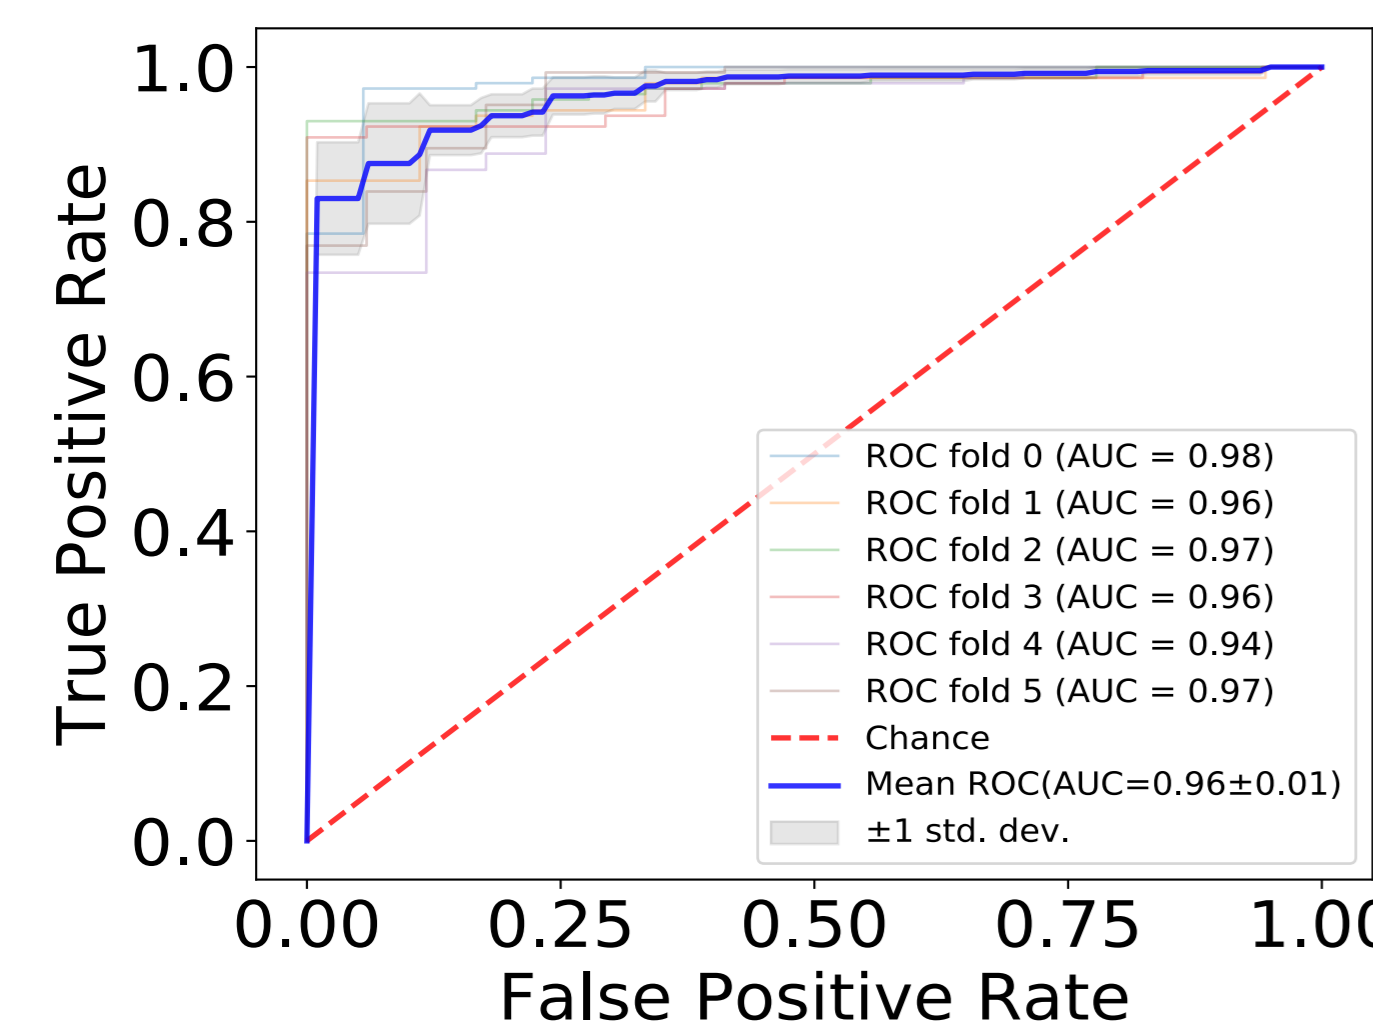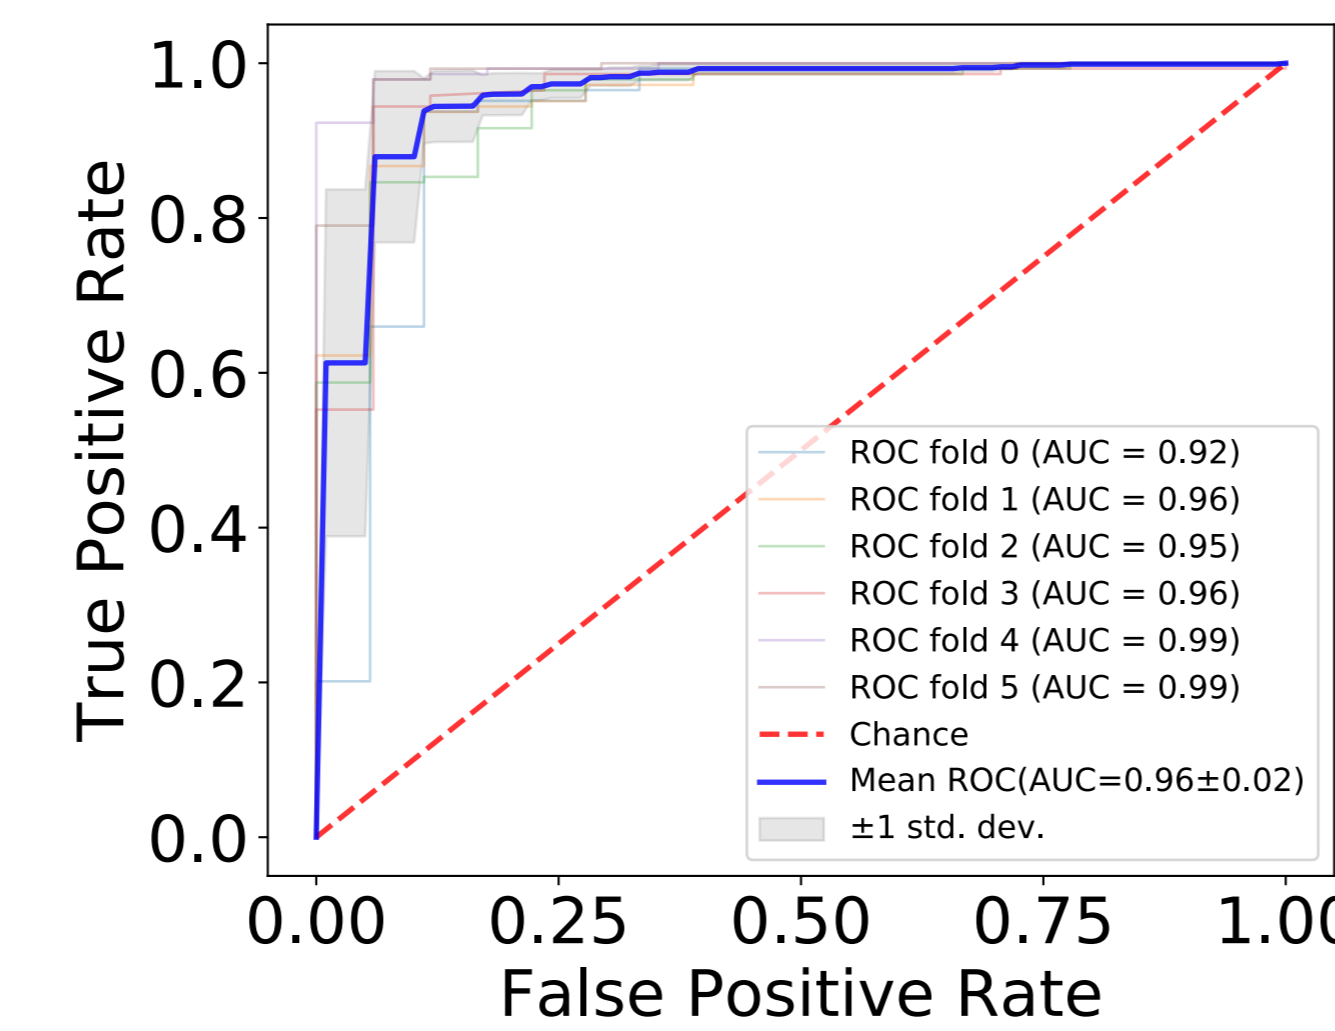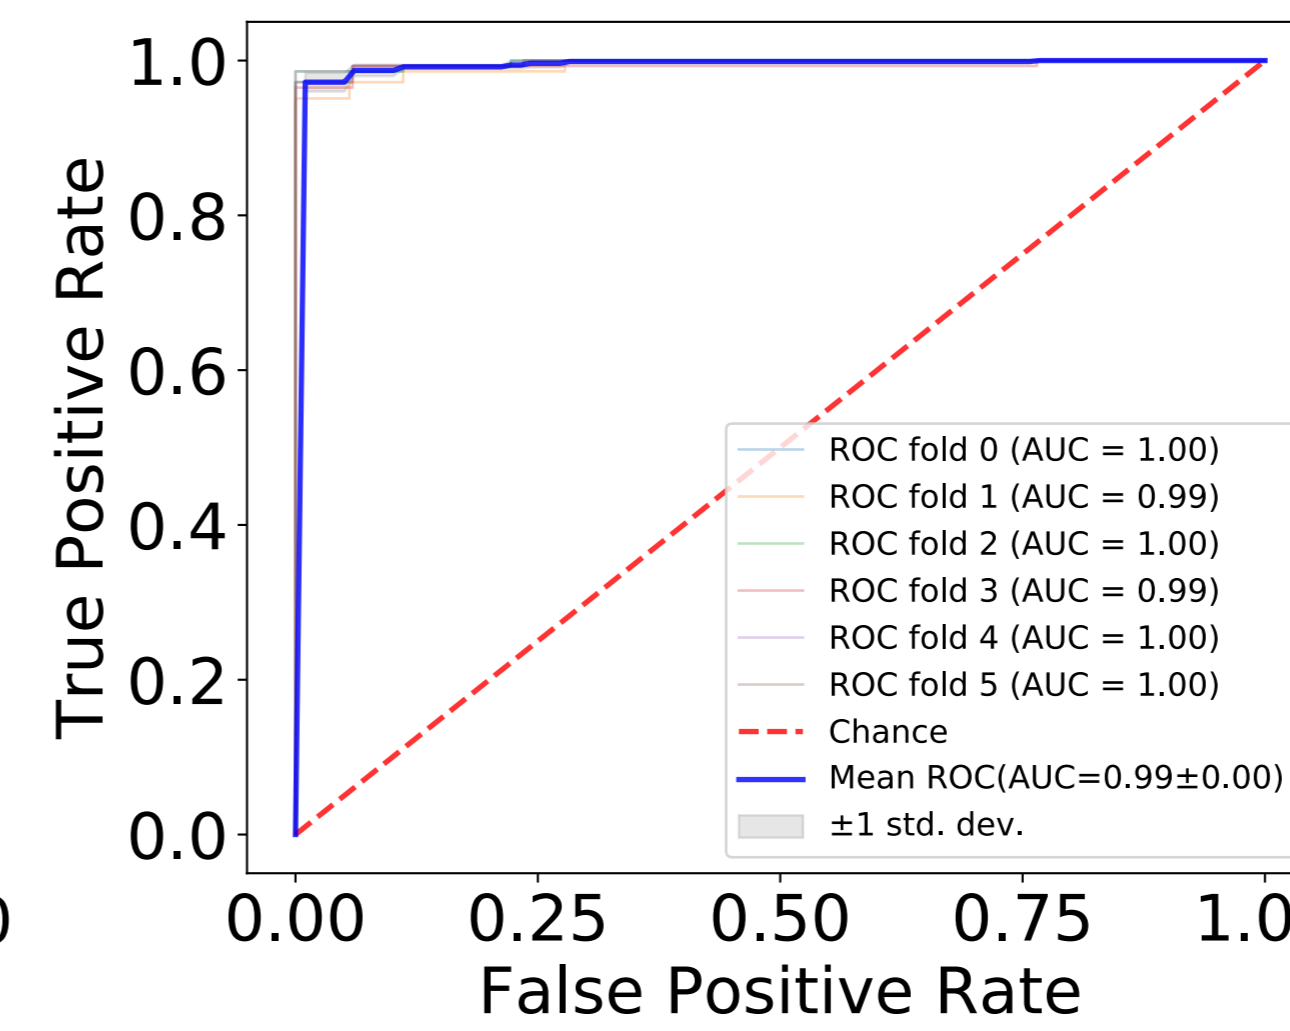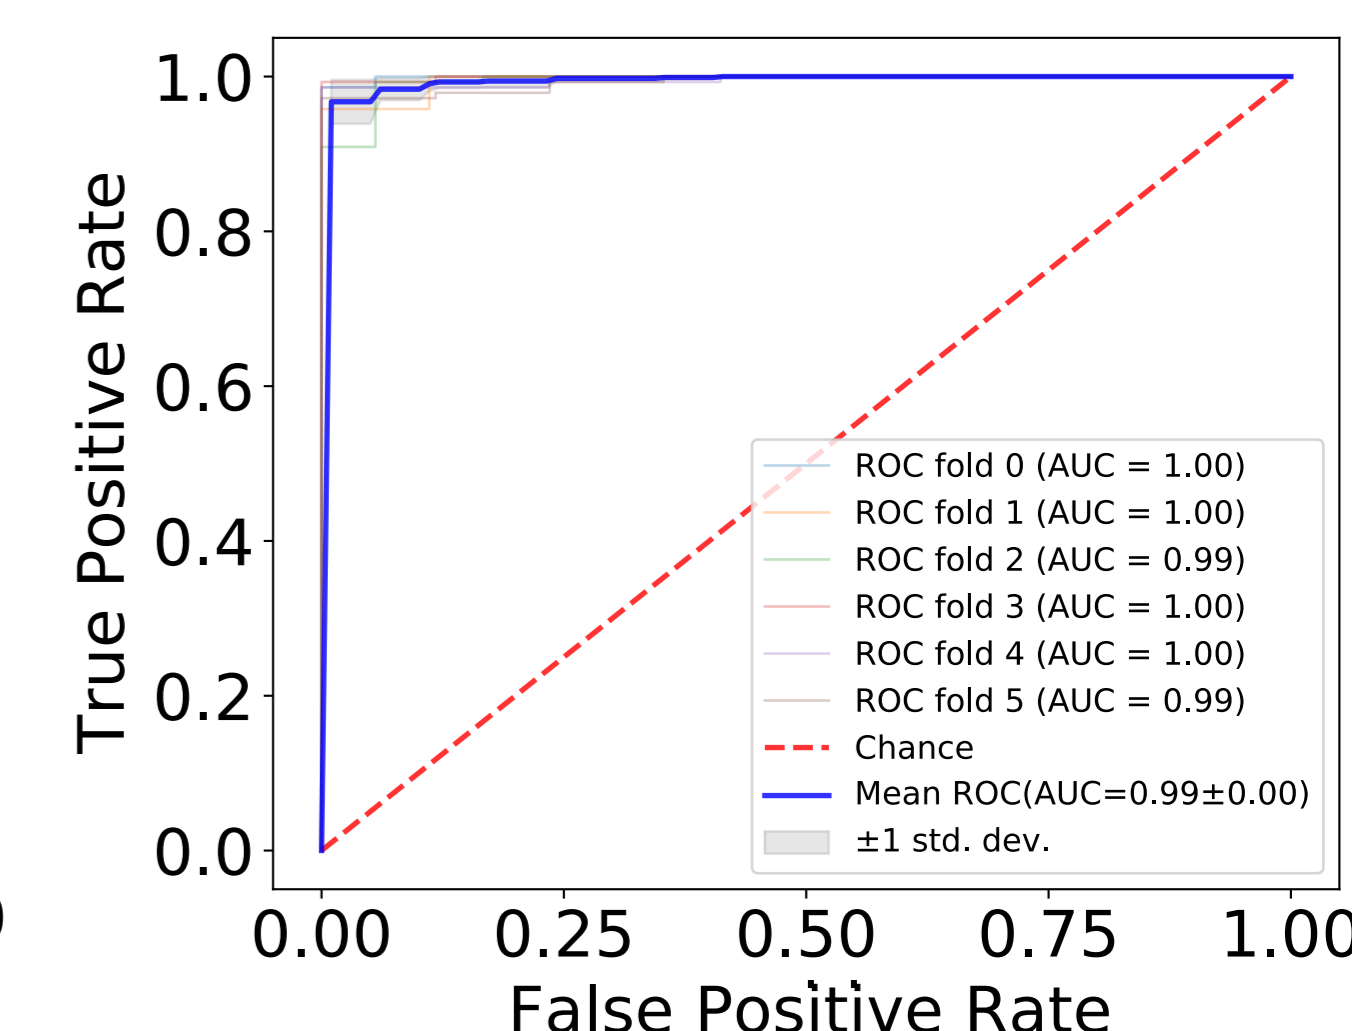

Supplement: HCC_Sfigure3.pdf [file HCC_Sfigure3.pdf]
