# Supplementary material for: Prognostic analysis of histopathological images using pre-trained convolutional neural networks: application to hepatocellular carcinoma
Source: PeerJ journal article supplement (doi:10.7717/peerj.8668), 2020-03-12

Last Epoch - Train Loss: 0.185, Val Loss: 0.317

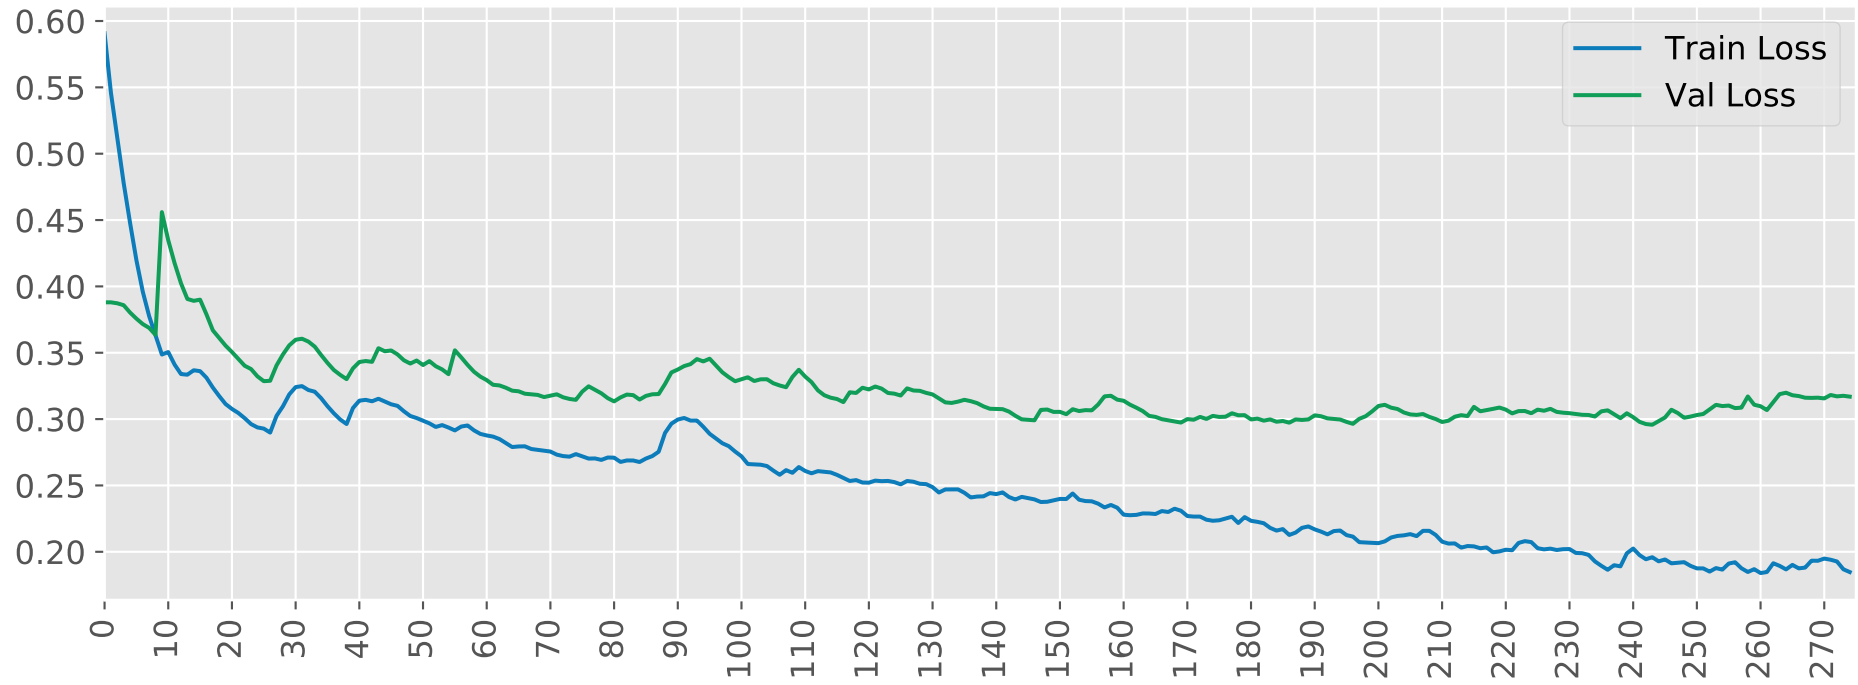

Last Epoch - Train Accuracy: 0.930, Val Accuracy: 0.862

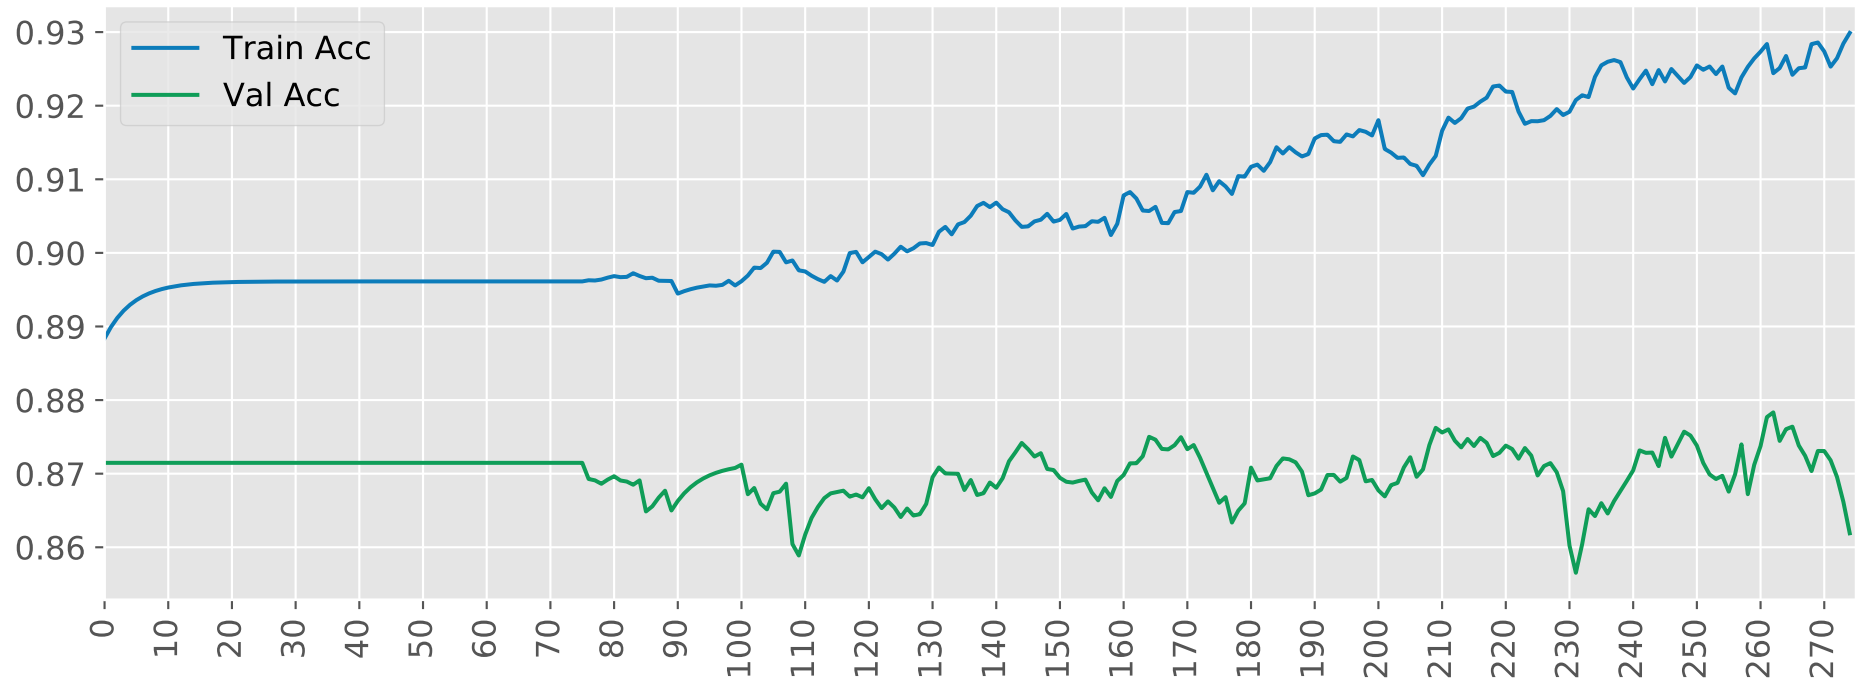

Supplement: HCC_Sfigure6.pdf [file HCC_Sfigure6.pdf]
